# Supplementary material for: Prognostic Importance of Pulmonary Arterial Capacitance in Acute Decompensated Heart Failure With Preserved Ejection Fraction
Source: PubMed Central journal article supplement — J Am Heart Assoc. 2021 Oct 6;10(20):e023043. doi: 10.1161/JAHA.121.023043 (PMC8751883; doi:10.1161/jaha.121.023043), 2021-10-06
Supplement: JAH3-10-e023043-s001.pdf [file JAH3-10-e023043-s001.pdf]

# **SUPPLEMENTAL MATERIAL**

## **Appendix**

### **Details of PURSUIT-HFpEF registry**

#### **The OCVC-Heart Failure Investigators**

Chair: *Yasushi Sakata*, Department of Cardiovascular Medicine, Osaka University Graduate School of Medicine, 2-2 Yamada-oka, Suita 565-0871, Japan

Secretariat: *Shungo Hikoso (Chief), Daisaku Nakatani, Hiroya Mizuno, Katsuki Okada, Tomoharu Dohi, Yohei Sotomi, Akihiro Sunaga, Hirota Kida, Bolrathanak Oeun, and Taiki Sato*; Department of Cardiovascular Medicine, Osaka University Graduate School of Medicine, Suita, Japan.

#### **Collaborators**

*Masahiro Seo, Tetsuya Watanabe, and Takahisa Yamada*, Osaka General Medical Center, Osaka, Japan; *Takaharu Hayashi and Yoshiharu Higuchi*, Osaka Police Hospital, Osaka, Japan; *Masaharu Masuda, Mitsutoshi Asai, and Toshiaki Mano*, Kansai Rosai Hospital, Amagasaki, Japan; *Hisakazu Fuji*, Kobe Ekisaikai Hospital, Kobe, Japan; *Daisaku Masuda, Shunsuke Tamaki, Ryu Shutta, and Shizuya Yamashita*, Rinku General Medical Center, Izumisano, Japan; *Masami Sairyō and Yusuke Nakagawa*, Kawanishi City Hospital, Kawanishi, Japan; *Haruhiko Abe, Yasunori Ueda, and Yasushi Matsumura*, National Hospital Organization Osaka National Hospital, Osaka, Japan; *Kunihiko Nagai*, Ikeda Municipal Hospital, Ikeda, Japan; *Masamichi Yano, Masami Nishino, and Jun Tanouchi*, Osaka Rosai Hospital, Sakai, Japan; *Yoh Arita and, Nobuyuki Ogasawara*, Japan Community Health Care Organization Osaka Hospital, Osaka, Japan; *Takamaru Ishizu, Minoru Ichikawa and Yuzuru Takano*, Higashiosaka City Medical Center, Higashiosaka, Japan; *Eisai Rin*, Kawachi General Hospital, Higashiosaka, Japan; *Yukinori Shinoda, Koichi Tachibana and Shiro Hoshida*, Yao Municipal Hospital, Yao, Japan; *Masahiro Izumi*, Kinki Central Hospital, Itami, Japan; *Hiroyoshi Yamamoto and Hiroyasu Kato*, Japan Community Health Care Organization, Osaka

Minato Central Hospital, Osaka, Japan; *Kazuhiro Nakatani and Yuji Yasuga*, Sumitomo Hospital, Osaka, Japan; *Mayu Nishio and Keiji Hirooka*, Saiseikai Senri Hospital, Suita, Japan; *Takahiro Yoshimura and Yoshinori Yasuoka*, National Hospital Organization Osaka Minami Medical Center, Kawachinagano, Japan; *Akihiro Tani*, Kano General Hospital, Osaka, Japan; *Yasushi Okumoto*, Kinan Hospital, Tanabe, Japan; *Yasunaka Makino*, Hyogo Prefectural Nishinomiya Hospital, Nishinomiya, Japan; *Toshinari Onishi and Katsuomi Iwakura*, Sakurabashi Watanabe Hospital, Osaka, Japan; *Yoshiyuki Kijima*, Japan Community Health Care Organization, Hoshigaoka Medical Center, Hirakata, Japan; *Takashi Kitao and Hideyuki Kanai*, Minoh City Hospital, Minoh, Japan; *Masashi Fujita*, Osaka International Cancer Institute, Osaka, Japan; *Koichiro Harada*, Suita Municipal Hospital, Suita, Japan; *Masahiro Kumada and Osamu Nakagawa*, Toyonaka Municipal Hospital, Toyonaka, Japan; *Ryo Araki and Takayuki Yamada*, Otemae Hospital, Osaka, Japan; *Akito Nakagawa and Yoshio Yasumura*, Amagasaki Chuo Hospital, Amagasaki, Japan; and *Taiki Sato, Akihiro Sunaga, Bolrathanak Oeun, Hirota Kida, Yohei Sotomi, Tomoharu Dohi, Kei Nakamoto, Katsuki Okada, Fusako Sera, Hidetaka Kioka, Tomohito Ohtani, Toshihiro Takeda, Daisaku Nakatani, Hiroya Mizuno, Shungo Hikoso, and Yasushi Sakata*, Osaka University Graduate School of Medicine, Suita, Japan.

**Table S1. Baseline clinical characteristics divided with RHC-PAC tertiles**

|                                          | all patients     | tertile 1:<br>RHC-PAC < 2.51 | tertile 2:<br>2.51 ≤ RHC-PAC < 3.88 | tertile 3:<br>3.88 ≤ RHC-PAC | P-value |
|------------------------------------------|------------------|------------------------------|-------------------------------------|------------------------------|---------|
| N                                        | 167              | 55                           | 56                                  | 56                           |         |
| Age, years                               | 81 (74–86)       | 83 (78–87)                   | 82 (74–85)                          | 79 (70–84)                   | 0.005   |
| gender, female                           | 88 (53)          | 39 (71)                      | 29 (52)                             | 20 (36)                      | 0.001   |
| general condition at discharge           |                  |                              |                                     |                              |         |
| BMI, kg/m <sup>2</sup>                   | 21.2 (19.0–23.4) | 19.7 (18.1–22.4)             | 22.1 (19.6–23.4)                    | 21.7 (19.4–24.6)             | 0.004   |
| SBP, mmHg                                | 123 (110–133)    | 121 (108–130)                | 122 (107–134)                       | 129 (113–133)                | 0.083   |
| DBP, mmHg                                | 64 (56–73)       | 66 (55–73)                   | 64 (57–73)                          | 65 (56–74)                   | 0.928   |
| Heart rate                               | 69 (61–77)       | 68 (60–78)                   | 67 (60–78)                          | 71 (61–77)                   | 0.768   |
| AF                                       | 49 (29)          | 19 (35)                      | 11 (20)                             | 19 (34)                      | 0.148   |
| GNRI                                     | 92 (85–100)      | 89 (83–96)                   | 94 (87–100)                         | 93 (86–103)                  | 0.032   |
| 6MWD, m                                  | 253 (149–336)    | 255 (158–319)                | 205 (101–340)                       | 290 (160–400)                | 0.266   |
| NYHA I / II / III / IV                   | 41 / 122 / 4 / 0 | 15 / 37 / 3 / 0              | 8 / 47 / 1 / 0                      | 18 / 38 / 0 / 0              | 0.066   |
| laboratory examination at discharge      |                  |                              |                                     |                              |         |
| Hemoglobin, g/dL                         | 11.8 (10.1–13.1) | 11.8 (10.6–13.1)             | 11.5 (9.8–13.2)                     | 11.8 (10.3–13.3)             | 0.666   |
| Hematocrit, %                            | 36 (31–40)       | 36 (32–40)                   | 35 (30–40)                          | 35 (32–39)                   | 0.767   |
| Serum total protein, g/dL                | 6.8 (6.2–7.2)    | 6.6 (6.2–7.2)                | 6.8 (6.3–7.2)                       | 6.9 (6.2–7.3)                | 0.805   |
| Serum albumin, g/dL                      | 3.5 (3.2–3.8)    | 3.4 (3.1–3.7)                | 3.5 (3.1–3.8)                       | 3.5 (3.2–3.8)                | 0.652   |
| eGFR, mL/min/1.73m <sup>2</sup>          | 44 (29–58)       | 40 (26–51)                   | 40 (26–64)                          | 50 (37–57)                   | 0.064   |
| NT-proBNP, ng/L                          | 1020 (473–2600)  | 1430 (618–3808)              | 1210 (384–2628)                     | 726 (381–1410)               | 0.009   |
| CRP, mg/dL                               | 0.35 (0.12–1.01) | 0.31 (0.11–0.93)             | 0.48 (0.15–1.12)                    | 0.26 (0.11–1.21)             | 0.615   |
| Echocardiographic variables at discharge |                  |                              |                                     |                              |         |
| Echocardiography examined day            | 13 (10–17)       | 14 (12–17)                   | 14 (11–18)                          | 12 (9–15)                    | 0.037   |
| LVDD, mm                                 | 47 (42–51)       | 43 (40–48)                   | 47 (43–50)                          | 49 (45–54)                   | < 0.001 |
| LVEDV (m-Simpson), mL                    | 89 (63–110)      | 69 (56–93)                   | 92 (69–109)                         | 99 (71–125)                  | < 0.001 |

|                                                                      |                      |                      |                     |                     |         |
|----------------------------------------------------------------------|----------------------|----------------------|---------------------|---------------------|---------|
| LVEDVI (m-Simpson), mL/m <sup>2</sup>                                | 53 (43–72)           | 51 (41–69)           | 62 (46–73)          | 59 (44–83)          | 0.060   |
| LVEF (m-Simpson), %                                                  | 61 (56–66)           | 59 (55–64)           | 61 (56–66)          | 62 (56–68)          | 0.415   |
| SV, mL                                                               | 51 (39–67)           | 42 (33–54)           | 57 (42–68)          | 60 (42–77)          | < 0.001 |
| LAD, mm                                                              | 43 (39–48)           | 44 (38–48)           | 43 (39–46)          | 44 (39–49)          | 0.412   |
| LAVI, mL/m <sup>2</sup>                                              | 50 (39–63)           | 55 (41–71)           | 48 (38–60)          | 48 (38–62)          | 0.200   |
| E/e'                                                                 | 12.6 (9.7–16.0)      | 13.7 (10.4–20.0)     | 11.2 (9.5–15.5)     | 11.3 (9.4–15.3)     | 0.092   |
| RVD, mm                                                              | 31 (28–36)           | 29 (26–36)           | 31 (26–36)          | 32 (29–38)          | 0.233   |
| TAPSE, mm                                                            | 17.8 (14.6–21.5)     | 16.8 (12.6–19.7)     | 18.3 (14.2–21.9)    | 18.7 (15.1–23.0)    | 0.012   |
| TRPG, mmHg                                                           | 26 (20–32)           | 28 (23–36)           | 26 (21–32)          | 22 (19–28)          | 0.003   |
| PASP, mmHg                                                           | 30 (24–36)           | 33 (28–40)           | 30 (25–36)          | 27 (23–32)          | 0.007   |
| PAPP, mmHg                                                           | 18 (14–22)           | 20 (17–24)           | 18 (15–21)          | 16 (14–19)          | 0.007   |
| TAPSE/PASP, mm/mmHg                                                  | 0.58 (0.45–0.77)     | 0.49 (0.39–0.66)     | 0.64 (0.47–0.77)    | 0.68 (0.49–0.98)    | 0.001   |
| PAC, mL/mmHg                                                         | 2.82 (2.00–3.98)     | 2.19 (1.66–2.86)     | 3.06 (2.34–3.89)    | 3.61 (2.30–5.31)    | < 0.001 |
| Mitral regurgitation<br>(none / trace / mild / moderate)             | 11 / 65 / 74 / 17    | 3 / 16 / 29 / 7      | 3 / 28 / 23 / 2     | 5 / 21 / 22 / 8     | 0.181   |
| Tricuspid regurgitation<br>(none / trace / mild / moderate / severe) | 4 / 72 / 72 / 18 / 1 | 1 / 15 / 28 / 10 / 1 | 2 / 25 / 26 / 3 / 0 | 1 / 32 / 18 / 5 / 0 | 0.054   |
| Aortic stenosis (none / mild)                                        | 160 / 7              | 52 / 3               | 54 / 2              | 54 / 2              | 0.850   |
| Mitral stenosis (none / mild)                                        | 165 / 2              | 53 / 2               | 56 / 0              | 56 / 0              | 0.127   |
| <b>Right Heart Catheterization</b>                                   |                      |                      |                     |                     |         |
| RHC examined day                                                     | 10 (7–13)            | 10 (7–13)            | 11 (8–14)           | 9 (6–13)            | 0.231   |
| Heart rate at RHC                                                    | 70 (60–77)           | 74 (60–83)           | 69 (63–76)          | 67 (58–73)          | 0.027   |
| mean RAP, mmHg                                                       | 6 (3–9)              | 8 (4–11)             | 5 (4–8)             | 6 (3–8)             | 0.011   |
| RVEDP, mmHg                                                          | 6 (4–10)             | 7 (4–11)             | 6 (4–11)            | 6 (5–10)            | 0.472   |
| PASP, mmHg                                                           | 32 (27–40)           | 39 (31–49)           | 32 (27–36)          | 28 (22–33)          | < 0.001 |
| PADP, mmHg                                                           | 14 (9–18)            | 16 (9–21)            | 13 (10–16)          | 12 (9–18)           | 0.113   |
| PAMP, mmHg                                                           | 21 (17–25)           | 24 (21–30)           | 20 (17–24)          | 18 (14–23)          | < 0.001 |
| PAPP, mmHg                                                           | 19 (14–25)           | 25 (18–32)           | 20 (16–23)          | 14 (12–19)          | < 0.001 |
| PAWP, mmHg                                                           | 13 (9–18)            | 15 (12–21)           | 12 (9–17)           | 11 (6–17)           | < 0.001 |
| SV, mL                                                               | 60 (46–74)           | 46 (36–62)           | 59 (47–72)          | 71 (60–94)          | < 0.001 |
| CO, L/min                                                            | 4.0 (3.1–4.9)        | 3.2 (2.5–4.2)        | 3.9 (3.2–4.6)       | 4.7 (3.9–5.5)       | < 0.001 |
| PVR, dyne*sec*cm <sup>-5</sup>                                       | 157 (106–209)        | 200 (152–253)        | 168 (124–209)       | 121 (81–150)        | < 0.001 |
| RHC-PAC, mL/mmHg                                                     | 3.00 (2.31–4.27)     | 2.00 (1.65–2.31)     | 3.00 (2.61–3.37)    | 4.66 (4.626–5.55)   | < 0.001 |

Values are given as median (IQR) or n (%).

Age is given on admission and all the others except right heart catheterization are at discharge. GNRI was calculated as:

$$14.89 \times [\textit{serum albmin}] + 41.7 \times \frac{[\textit{body mass index}]}{22}$$

Abbreviations: 6MWD, 6-minutes walking distance; AF, atrial fibrillation; BMI, body mass index; CO, cardiac output; CRP, C-reactive protein; DBP, diastolic blood pressure; PAC, pulmonary artery capacitance estimated with echocardiography; E/e', The ratio of mitral peak velocity of early filling E to the velocity of mitral annulus early diastolic motion e'; eGFR, estimated glomerular filtration rate; GNRI, Geriatric Nutritional Risk Index; LAD, left atrial dimension; LAVI, left atrial dimension index; LVDd, left ventricular end-diastolic diameter; LVEF, left ventricular ejection fraction; LVEDV, left ventricular end-diastolic volume; LVEDVI, left ventricular end-diastolic volume index; NT-proBNP, N-terminal pro-B-type natriuretic peptide; NYHA, New York heart failure functional class; PAC, pulmonary artery capacitance estimated with echocardiography; PAMP, pulmonary artery mean pressure; PAPP, pulmonary artery pulse pressure; PASP, pulmonary artery systolic pressure; PAWP, pulmonary artery wedge pressure; PVR, pulmonary vascular resistance; RAP, right atrial pressure; RHC, right heart catheterization; RHC-PAC, pulmonary artery capacitance measured with right heart catheterization; RVD, basal right ventricular linear dimension; RVEDP, right ventricular end-diastolic pressure; SBP, systolic blood pressure; SV, stroke volume; TAPSE, tricuspid annular plane systolic excursion; TRPG, tricuspid valve regurgitation pressure gradient

Between-group comparisons were performed using Kruskal–Wallis test or Pearson's chi-squared test.

**Table S2. Baseline Clinical Characteristics of patients with and without RHC-PAC**

|                                | all patients     | RHC-PAC obtained | RHC-PAC not obtained | P value |
|--------------------------------|------------------|------------------|----------------------|---------|
| N                              | 705              | 167              | 538                  |         |
| Age, years                     | 83 (78–87)       | 81 (74–86)       | 84 (77–88)           | < 0.001 |
| gender, female                 | 389 (55)         | 88 (53)          | 301 (56)             | 0.460   |
| prior HF hospitalization       | 168 (24)         | 36 (22)          | 132 (25)             | 0.385   |
| comorbidities                  |                  |                  |                      |         |
| Hypertension                   | 599 (85)         | 144 (86)         | 455 (85)             | 0.670   |
| Diabetes                       | 227 (32)         | 62 (37)          | 165 (31)             | 0.121   |
| Dyslipidemia                   | 286 (41)         | 80 (48)          | 206 (39)             | 0.032   |
| Hyperuricemia                  | 227 (32)         | 73 (44)          | 154 (29)             | < 0.001 |
| CKD                            | 278 (40)         | 82 (49)          | 196 (37)             | 0.004   |
| COPD                           | 55 (8)           | 18 (11)          | 37 (7)               | 0.099   |
| malignancy                     | 84 (12)          | 10 (6)           | 74 (14)              | 0.007   |
| general condition at discharge |                  |                  |                      |         |
| BMI, kg/m <sup>2</sup>         | 21.3 (18.9–23.9) | 21.2 (19.0–23.4) | 21.3 (18.9–24.0)     | 0.677   |
| SBP, mmHg                      | 119 (107–130)    | 123 (110–133)    | 118 (106–129)        | 0.004   |
| DBP, mmHg                      | 65 (57–74)       | 64 (56–73)       | 65 (58–74)           | 0.447   |
| Heart rate                     | 70 (61–79)       | 69 (61–77)       | 70 (61–80)           | 0.267   |
| AF                             | 273 (39)         | 49 (29)          | 224 (42)             | 0.004   |

|                                          |                    |                  |                    |         |
|------------------------------------------|--------------------|------------------|--------------------|---------|
| GNRI                                     | 92 (85–99)         | 92 (85–100)      | 91 (85–98)         | 0.413   |
| 6MWD, m                                  | 250 (154–335)      | 253 (149–336)    | 250 (155–332)      | 0.909   |
| NYHA I / II / III / IV                   | 262 / 433 / 41 / 1 | 41 / 122 / 4 / 0 | 209 / 291 / 34 / 1 | < 0.001 |
| laboratory examination at discharge      |                    |                  |                    |         |
| Hemoglobin, g/dL                         | 11.3 (10.1–12.8)   | 11.8 (10.1–13.1) | 11.2 (10.1–12.6)   | 0.045   |
| Hematocrit, %                            | 34 (31–39)         | 36 (31–40)       | 34 (31–38)         | 0.105   |
| Serum total protein, g/dL                | 6.6 (6.2–7.1)      | 6.8 (6.2–7.2)    | 6.6 (6.2–7.1)      | 0.056   |
| Serum albumin, g/dL                      | 3.4 (3.1–3.7)      | 3.5 (3.2–3.8)    | 3.4 (3.1–3.7)      | 0.041   |
| eGFR, mL/min/1.73m <sup>2</sup>          | 44 (30–55)         | 44 (29–58)       | 43 (31–55)         | 0.568   |
| NT-proBNP, ng/L                          | 1057 (466–2372)    | 1020 (473–2600)  | 1057 (465–2335)    | 0.692   |
| CRP, mg/dL                               | 0.26 (0.11–0.75)   | 0.35 (0.12–1.01) | 0.24 (0.10–0.63)   | 0.027   |
| Echocardiographic variables at discharge |                    |                  |                    |         |
| Echocardiography examined day            | 14 (10–19)         | 13 (10–17)       | 14 (10–19)         | 0.972   |
| LVDd, mm                                 | 45 (41–50)         | 47 (42–51)       | 45 (41–49)         | 0.009   |
| LVEF (m-Simpson), %                      | 61 (55–66)         | 61 (56–66)       | 61 (55–66)         | 0.674   |
| SV, mL                                   | 46 (35–61)         | 51 (39–67)       | 45 (34–59)         | < 0.001 |
| LAD, mm                                  | 44 (39–49)         | 43 (39–48)       | 44 (39–49)         | 0.165   |
| LAVI, mL/m <sup>2</sup>                  | 50 (37–65)         | 50 (39–63)       | 50 (36–65)         | 0.750   |
| E/e'                                     | 12.5 (9.6–16.6)    | 12.6 (9.7–16.0)  | 12.5 (9.6–16.7)    | 0.803   |
| RVD, mm                                  | 32 (28–36)         | 31 (28–36)       | 33 (28–36)         | 0.026   |
| TAPSE, mm                                | 17.3 (14.4–20.4)   | 17.8 (14.6–21.5) | 17.2 (14.3–20.0)   | 0.180   |
| TRPG, mmHg                               | 27 (22–32)         | 26 (20–32)       | 27 (22–32)         | 0.041   |



|                                                                         |                           |                      |                          |         |
|-------------------------------------------------------------------------|---------------------------|----------------------|--------------------------|---------|
| PASP, mmHg                                                              | 31 (26–38)                | 30 (24–36)           | 31 (26–38)               | 0.029   |
| PAPP, mmHg                                                              | 19 (15–23)                | 18 (14–22)           | 19 (16–23)               | 0.029   |
| TAPSE/PASP, mm/mmHg                                                     | 0.54 (0.42–0.72)          | 0.58 (0.45–0.77)     | 0.54 (0.42–0.70)         | 0.009   |
| PAC, mL/mmHg                                                            | 2.52 (1.78–3.32)          | 2.82 (2.00–3.98)     | 2.42 (1.73–3.20)         | < 0.001 |
| Mitral valve regurgitation (none / trace / mild / moderate)             | 38 / 232 / 310 / 125      | 11 / 65 / 74 / 17    | 27 / 167 / 236 / 108     | 0.018   |
| Tricuspid valve regurgitation (none / trace / mild / moderate / severe) | 12 / 235 / 301 / 141 / 16 | 4 / 72 / 72 / 18 / 1 | 8 / 163 / 229 / 123 / 15 | 0.001   |
| Aortic valve stenosis (none / mild)                                     | 657 / 48                  | 160 / 7              | 497 / 41                 | 0.124   |
| Mitral valve stenosis (none / mild)                                     | 690 / 15                  | 165 / 2              | 525 / 13                 | 0.340   |
| Medication at discharge                                                 |                           |                      |                          |         |
| Antiplatelet                                                            | 193 (27)                  | 60 (36)              | 133 (25)                 | 0.004   |
| ACE inhibitor or ARB                                                    | 387 (55)                  | 82 (49)              | 305 (57)                 | 0.085   |
| Calcium channel blocker                                                 | 342 (49)                  | 87 (52)              | 255 (47)                 | 0.259   |
| β-blocker                                                               | 397 (56)                  | 104 (63)             | 293 (54)                 | 0.063   |
| loop diuretics                                                          | 567 (80)                  | 143 (86)             | 424 (78)                 | 0.052   |
| tolvaptan                                                               | 111 (16)                  | 34 (20)              | 77 (14)                  | 0.061   |
| aldosterone antagonist                                                  | 295 (42)                  | 73 (44)              | 222 (41)                 | 0.575   |
| anticoagulant                                                           | 440 (62)                  | 95 (57)              | 345 (64)                 | 0.092   |

Values are given as median (IQR) or n (%).

Age and comorbidities are given on admission and all the others are at discharge. GNRI was calculated as:

$$14.89 \times [\textit{serum albmin}] + 41.7 \times \frac{[\textit{body mass index}]}{22}$$

Abbreviations: 6MWD, 6-minutes walking distance; ACE, angiotensin-converting enzyme; AF, atrial fibrillation; ARB, angiotensin receptor blocker; BMI, body mass index; CKD, chronic kidney disease; COPD, chronic obstructive pulmonary disease; CRP, C-reactive protein; DBP, diastolic blood pressure; E/e', The ratio of mitral peak velocity of early filling E to the velocity of mitral annulus early diastolic motion e'; eGFR, estimated glomerular filtration rate; GNRI, Geriatric Nutritional Risk Index; HF, heart failure; LAD, left atrial dimension; LAVI, left atrial dimension index; LVDD, left ventricular end-diastolic diameter; LVEF, left ventricular ejection fraction; NT-proBNP, N-terminal pro-B-type natriuretic peptide; NYHA, New York heart failure functional class; PAC, pulmonary artery capacitance; PAPP, pulmonary artery pulse pressure; PASP, pulmonary artery systolic pressure; RVD, basal right ventricular linear dimension; SBP, systolic blood pressure; SV, stroke volume; TAPSE, tricuspid annular plane systolic excursion; TRPG, tricuspid valve regurgitation pressure gradient

Between-group comparisons were performed using Kruskal–Wallis test or Pearson's chi-squared test.

**Table S3. Firth's penalized Cox regression model for prognostic prediction of primary endpoint with RHC-PAC**

|                                             | Hazard ratio | Lower 95% CI | Upper 95% CI | P-value    |
|---------------------------------------------|--------------|--------------|--------------|------------|
| Univariable Cox regression                  |              |              |              |            |
| RHC-PAC, 1-mL/mmHg increments               | 0.71737875   | 0.53181805   | 0.93212049   | 0.01096244 |
| Multivariable Cox regression                |              |              |              |            |
| Model 1                                     |              |              |              |            |
| PAWP, 1-mmHg increments                     | 1.02601948   | 0.95611505   | 1.09609356   | 0.46582646 |
| RAP, 1-mmHg increments                      | 0.97960514   | 0.87120734   | 1.10105714   | 0.73140940 |
| PVR, 1-dyne*sec*cm <sup>-5</sup> increments | 0.99939252   | 0.99560331   | 1.00253958   | 0.72784528 |
| RHC-PAC, 1-mL/mmHg increments               | 0.71883795   | 0.50443914   | 0.98191005   | 0.03706094 |
| Model 2                                     |              |              |              |            |
| Age, 1-year increments                      | 1.01646969   | 0.97624612   | 1.06692205   | 0.45851959 |
| Female                                      | 0.90947510   | 0.46537297   | 1.79816293   | 0.78176114 |
| NT-proBNP, 1-ng/L increments                | 1.00007064   | 1.00002436   | 1.00010639   | 0.00637700 |
| RHC-PAC, 1-mL/mmHg increments               | 0.73056984   | 0.53330803   | 0.96532015   | 0.02579811 |

Firth's penalized Cox proportional hazard models of RHC-PAC for composite endpoint. The composite endpoint was defined as all-cause mortality or heart failure re-hospitalization. Multivariable Cox regression for primary endpoint was performed using covariates as follows: (model 1) hemodynamic parameters of PAWP, RAP and PVR, (model 2) clinical aspects of age, gender, and NT-proBNP, respectively.

Abbreviations: NT-proBNP, N-terminal pro-B-type natriuretic peptide; PAWP, pulmonary artery wedge pressure; PVR, pulmonary vascular resistance; RAP, right atrial pressure; RHC-PAC, pulmonary artery capacitance calculated with right heart catheterization

**Figure S1. Correlation of PAC with echocardiography and with right heart catheterization**

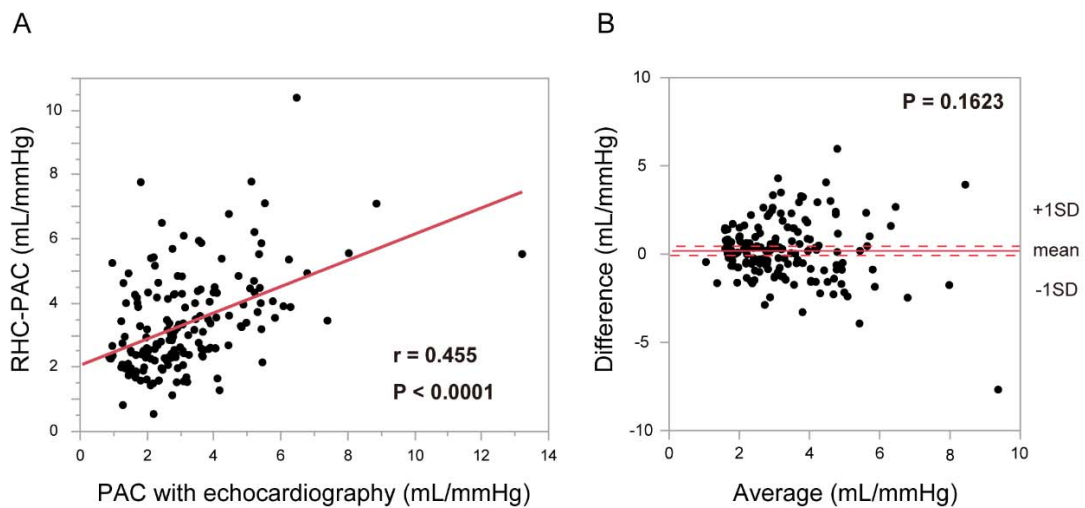

(A) The analysis of the correlation provides an  $r$  value of 0.455 with a  $P < 0.0001$  ( $n = 167$ ). (B) Bland and Altman analysis showed that the difference was not significant (mean difference  $\pm$  standard error;  $0.18 \pm 0.13$  mL/mmHg,  $P = 0.1623$ )

Abbreviation: PAC; pulmonary artery capacitance, RHC; right heart catheterization, SD; standard deviation

**Figure S2. Kaplan-Meier survival curves of PAC with right heart**

**catheterization**

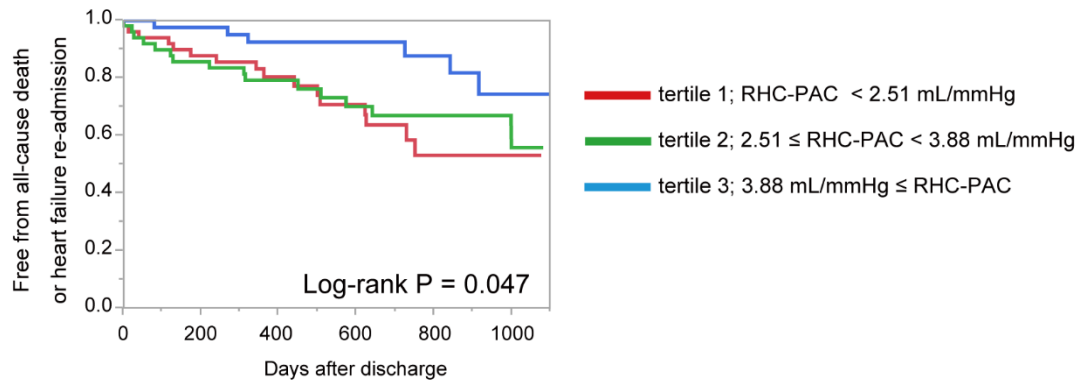

Number at risk

|           |    |    |    |    |    |    |
|-----------|----|----|----|----|----|----|
| tertile 1 | 55 | 42 | 28 | 21 | 11 | 7  |
| tertile 2 | 56 | 42 | 29 | 24 | 9  | 8  |
| tertile 3 | 56 | 41 | 29 | 27 | 16 | 11 |

Kaplan-Meier survival curves for prediction of composite endpoint of RHC-PAC

tertiles.

Abbreviations: RHC-PAC, pulmonary artery capacitance calculated with right heart

catheterization
